# Supplementary material for: EZH2 as a Prognostic Factor and Its Immune Implication with Molecular Characterization in Prostate Cancer: An Integrated Multi-Omics in Silico Analysis
Source: MDPI journal article supplement (doi:10.3390/biom12111617), 2022-11-02
Supplement: s1 [file s1]

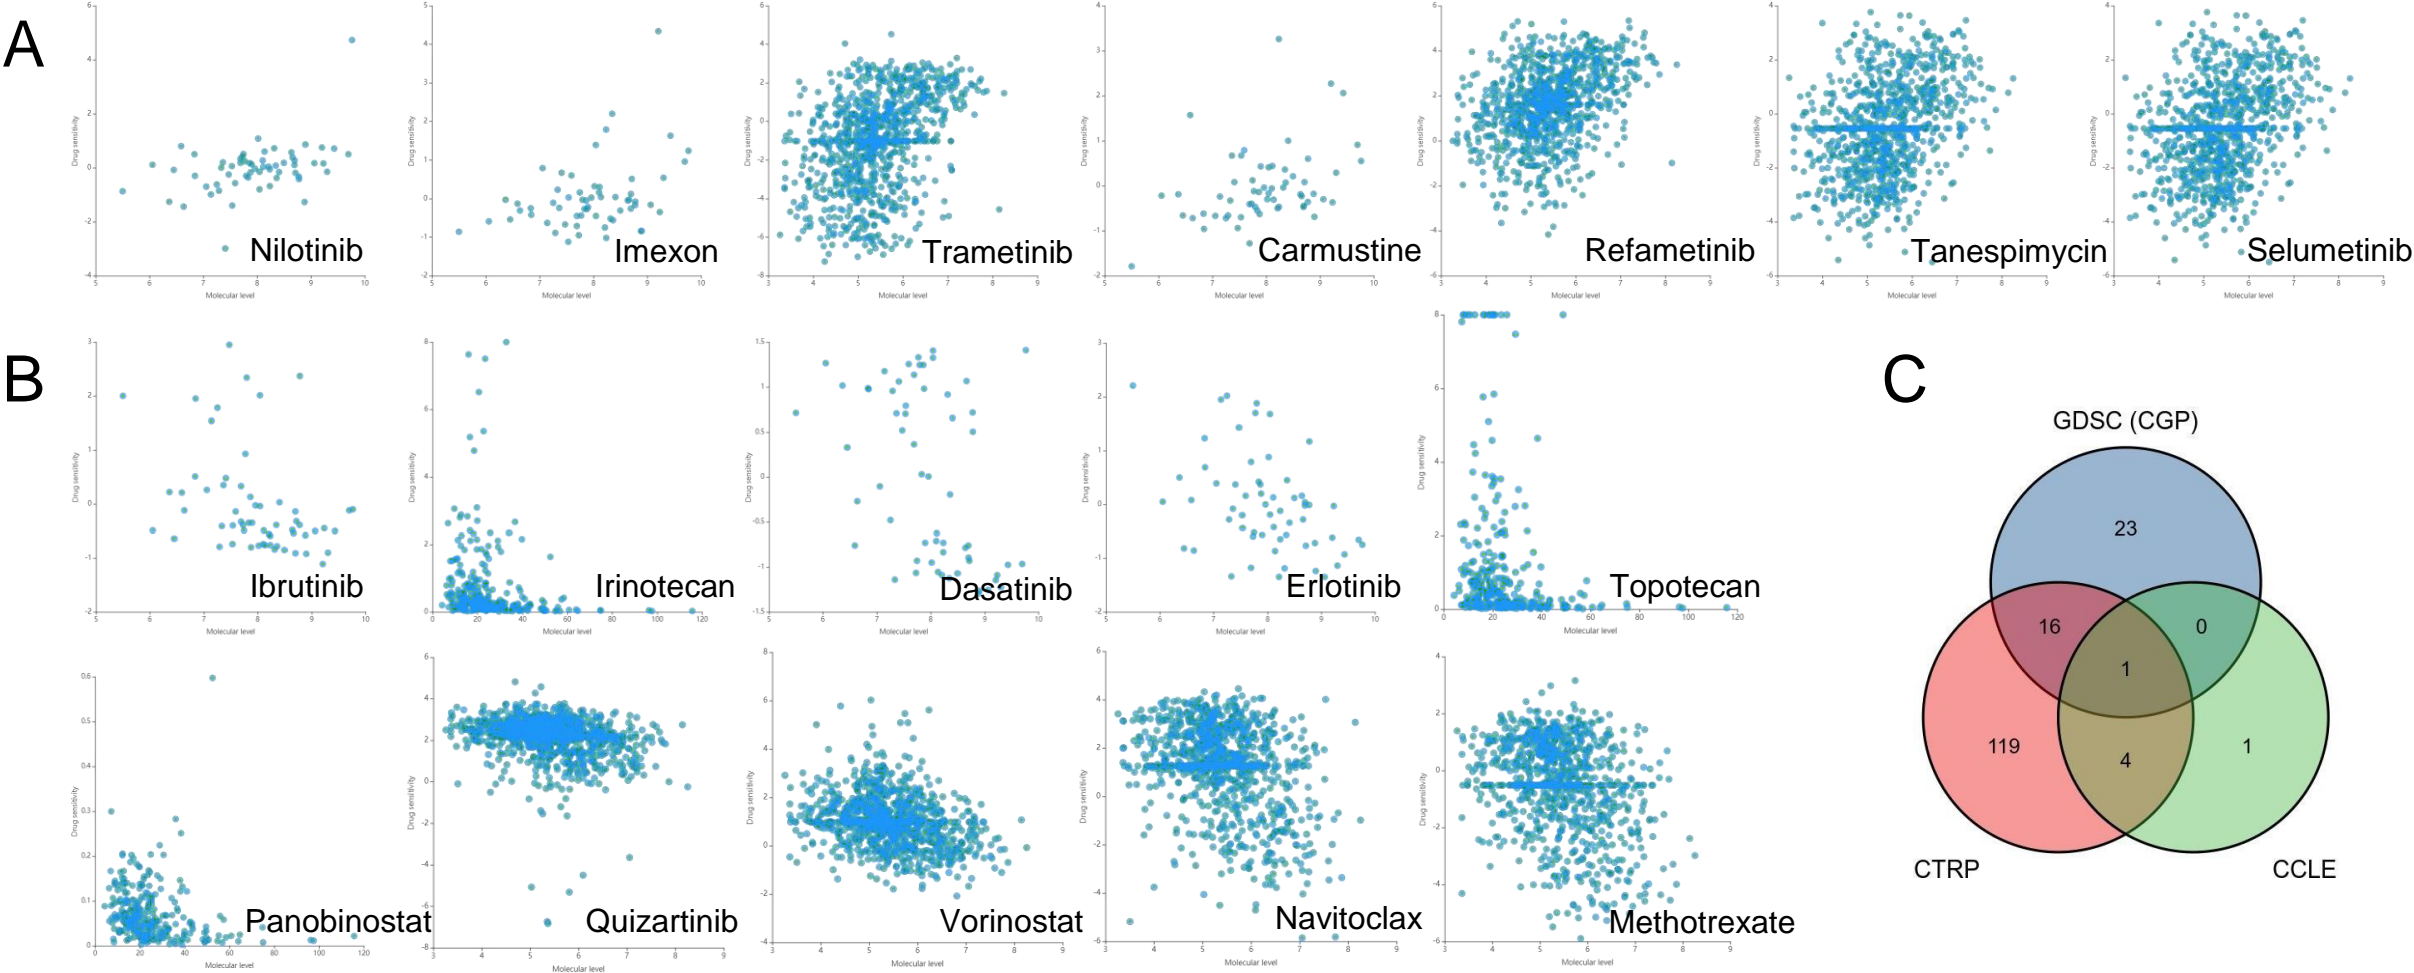

Figure S7. Correlations between EZH2 expression and drug (A) sensitivity and (B) resistance of tumor cells by RNAactDrug. (C) Venn diagram indicates the shared drug of three source using CARE.
