# Supplementary material for: EZH2 as a Prognostic Factor and Its Immune Implication with Molecular Characterization in Prostate Cancer: An Integrated Multi-Omics in Silico Analysis
Source: MDPI journal article supplement (doi:10.3390/biom12111617), 2022-11-02
Supplement: s1 [file s1]

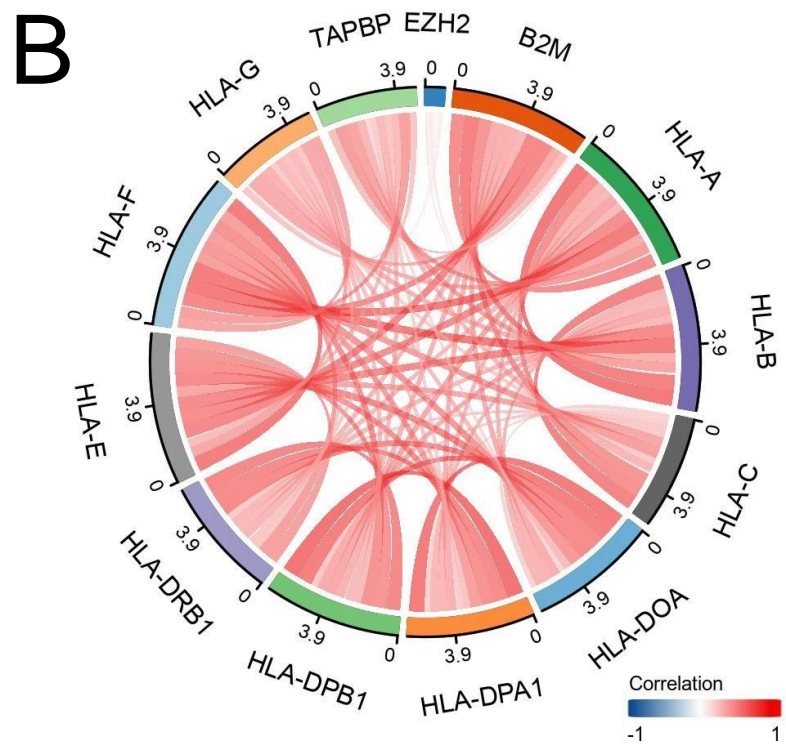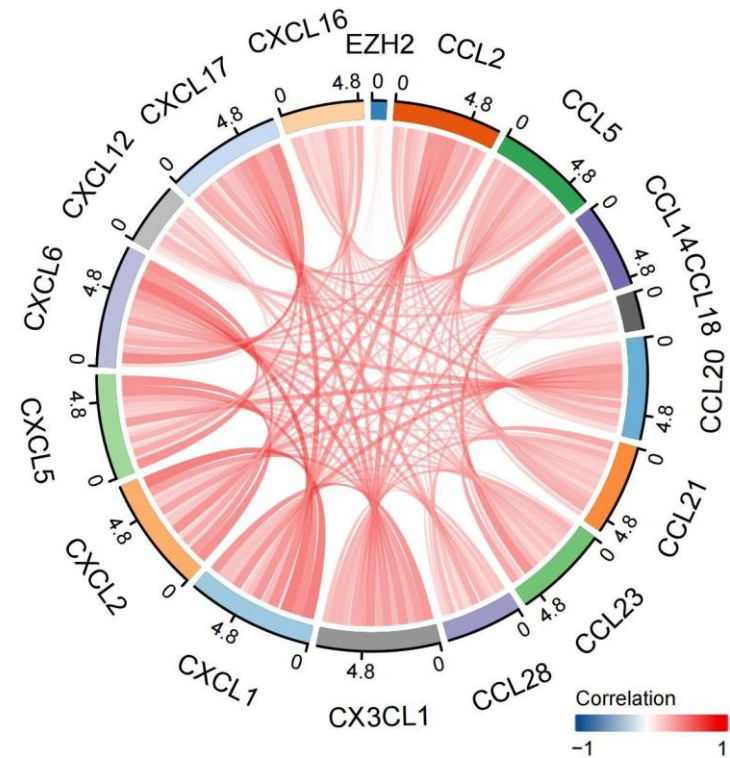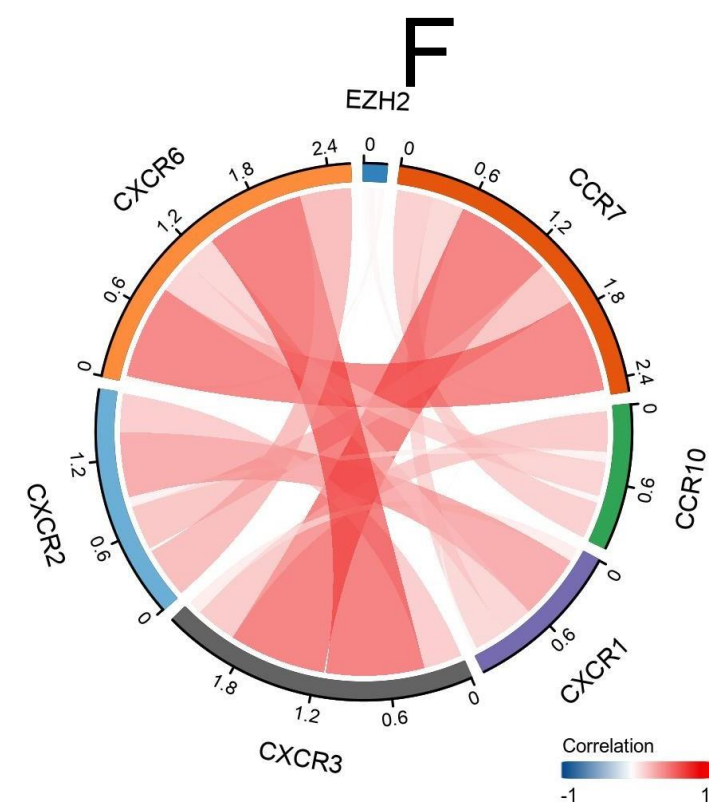

Figure S5. Correlations between EZH2 expression level and (A,B) MHC genes, (C,D) chemokine genes, and (E,F) chemokine receptor genes.
