# Supplementary material for: EZH2 as a Prognostic Factor and Its Immune Implication with Molecular Characterization in Prostate Cancer: An Integrated Multi-Omics in Silico Analysis
Source: MDPI journal article supplement (doi:10.3390/biom12111617), 2022-11-02
Supplement: s1 [file s1]

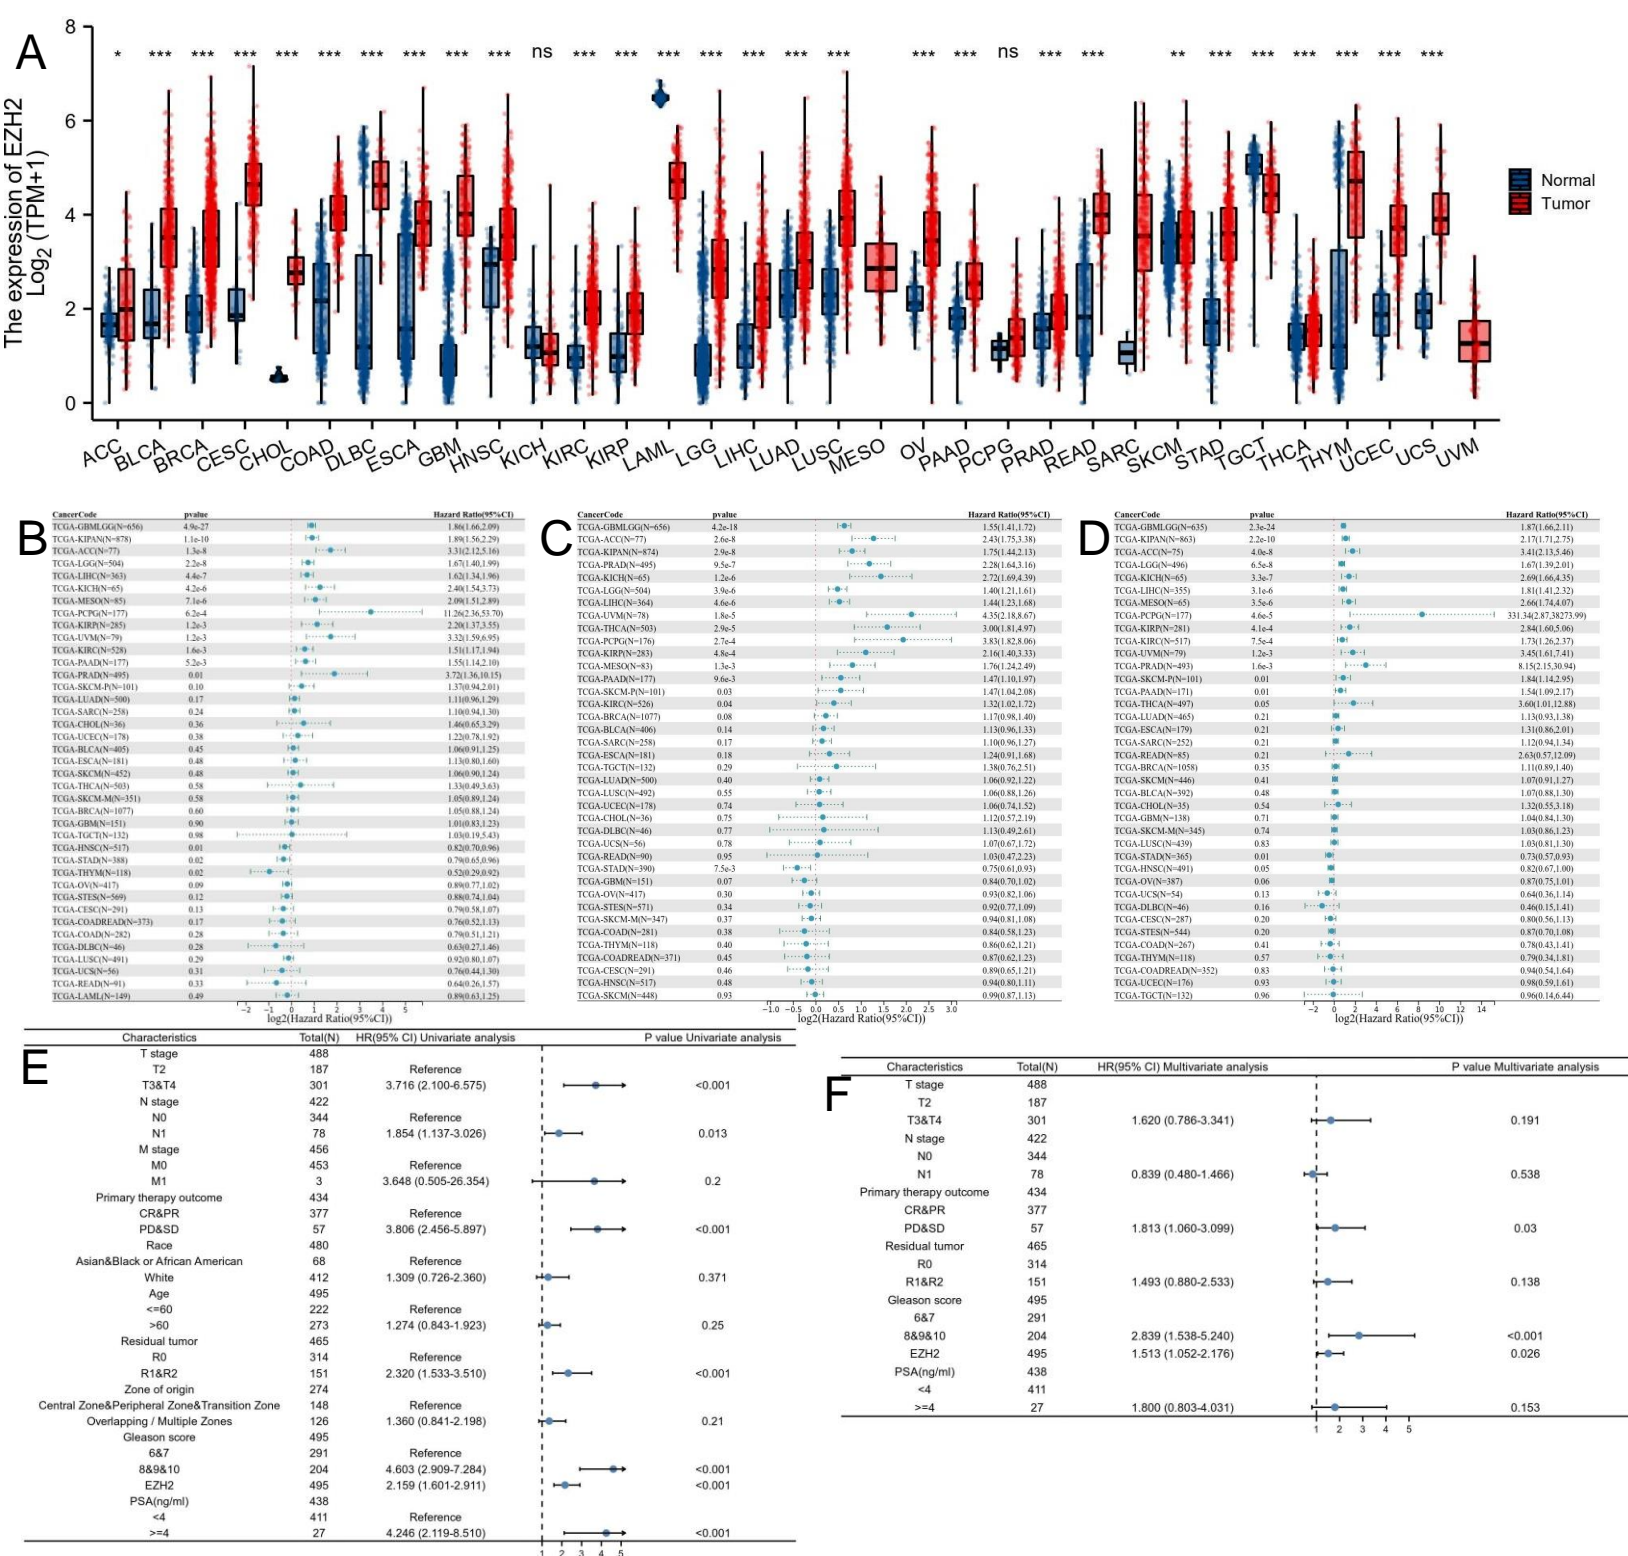

Figure S1. (A) Boxplots show EZH2 mRNA expression levels in pan-cancer from TCGA and GTEx databases. Forest plots show the prognostic value of EZH2 expression in pan-cancer, employing (B) OS, (C) PFS, and (D) DSS as outcome endpoints. (E) Univariate and (F) multivariate cox hazard regression analyses in PCa from TCGA database.
