# Supplementary material for: EZH2 as a Prognostic Factor and Its Immune Implication with Molecular Characterization in Prostate Cancer: An Integrated Multi-Omics in Silico Analysis
Source: MDPI journal article supplement (doi:10.3390/biom12111617), 2022-11-02
Supplement: s1 [file s1]

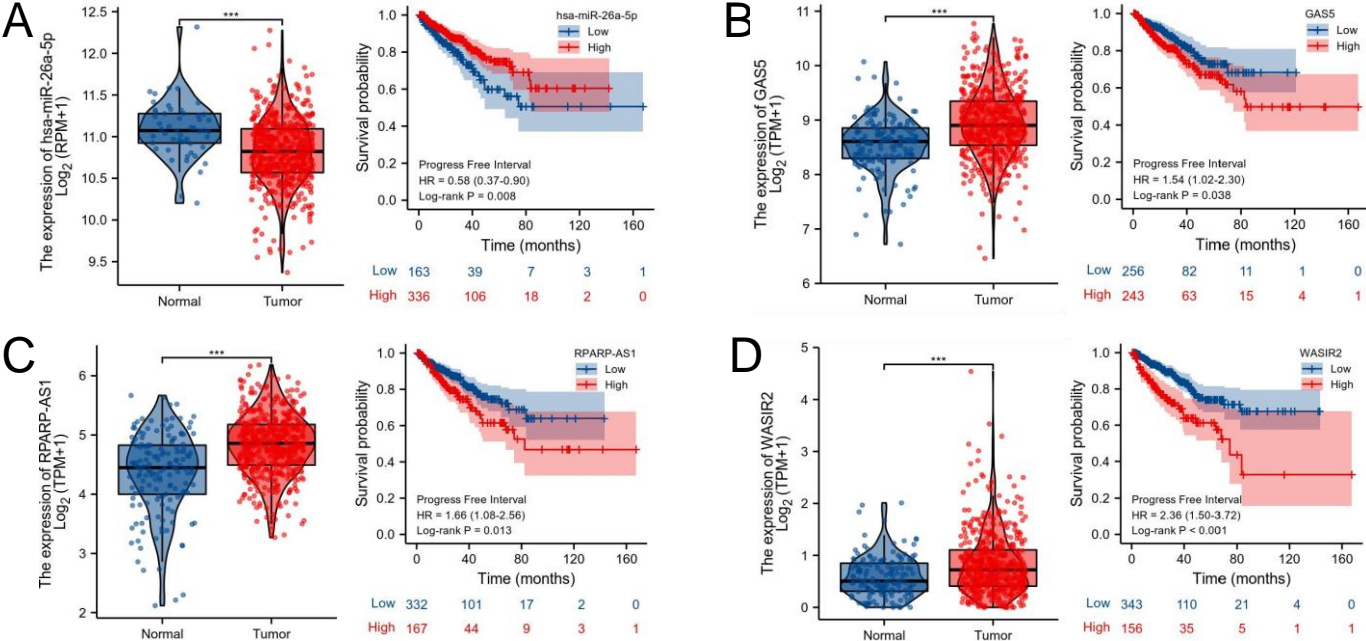

Figure S3. Expression analysis and PFS analysis of (A) miR-26a-5p, (B) GAS5, (C) THUMPD3-AS1, and (D) WASIR2 in PRAD patients.
