# Supplementary figures and images for: EZH2 as a Prognostic Factor and Its Immune Implication with Molecular Characterization in Prostate Cancer: An Integrated Multi-Omics in Silico Analysis
Source: MDPI journal article supplement (doi:10.3390/biom12111617), 2022-11-02

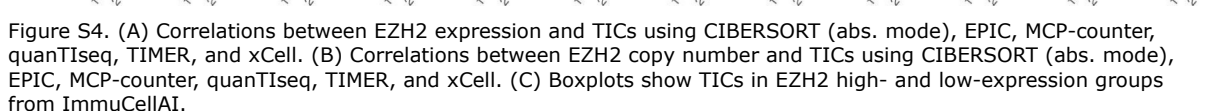

Supplement: s1 [file s1]

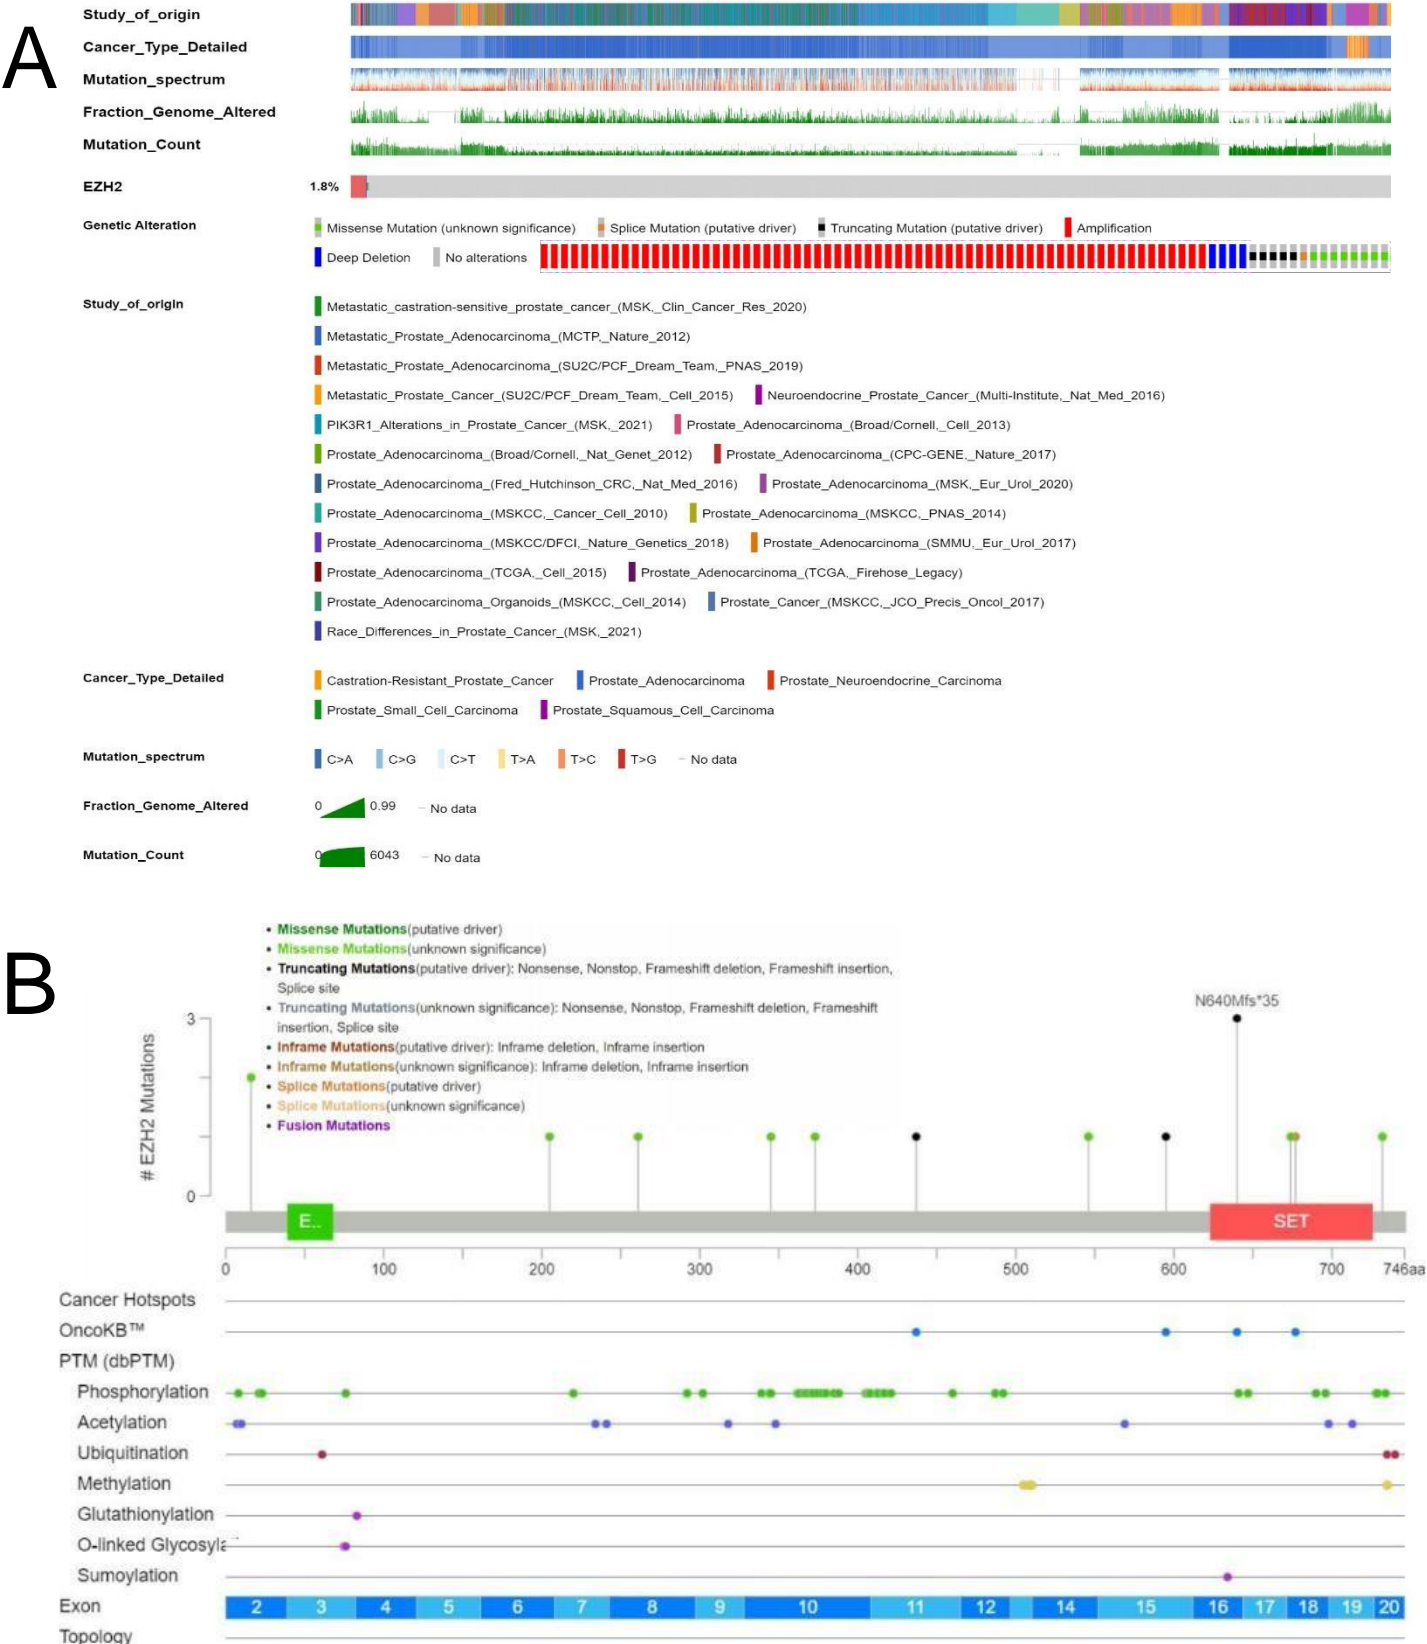

Supplement: s1 [file s1]
